# Supplementary material for: Chemical composition and light absorption of carbonaceous aerosols emitted from crop residue burning: influence of combustion efficiency
Source: Copernicus journal article supplement (doi:10.5194/acp-20-13721-2020), 2020-11-16
Supplement: Supplementary file 1 [file acp-20-13721-2020-supplement.pdf]

Supplement of Atmos. Chem. Phys., 20, 13721–13734, 2020  
<https://doi.org/10.5194/acp-20-13721-2020-supplement>  
© Author(s) 2020. This work is distributed under  
the Creative Commons Attribution 4.0 License.

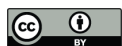

Atmospheric  
Chemistry  
and Physics  
Open Access  
EGU

*Supplement of*

## **Chemical composition and light absorption of carbonaceous aerosols emitted from crop residue burning: influence of combustion efficiency**

**Yujue Wang et al.**

*Correspondence to:* Min Hu ([minhu@pku.edu.cn](mailto:minhu@pku.edu.cn))

The copyright of individual parts of the supplement might differ from the CC BY 4.0 License.

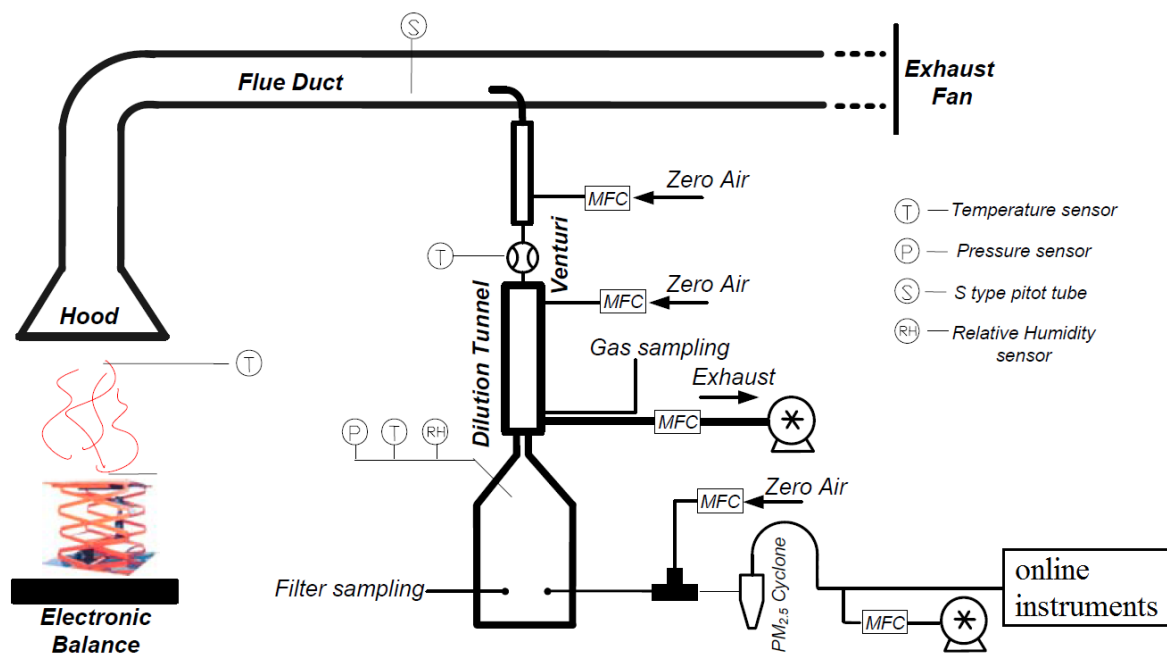

Figure S1 Scheme of the biomass burning simulation system (He et al., 2010).

Table S1 Burning conditions, including biofuel types, moisture contents and modified combustion efficiency (MCE), of simulated biomass burning experiments in this study

| Types of biomass fuels | Moisture content | MCE  |      |
|------------------------|------------------|------|------|
| Corn                   | 13%              | 0.83 |      |
|                        | low level        | 13%  | 0.82 |
|                        |                  | 13%  | 0.82 |
|                        | high level       | 18%  | 0.80 |
|                        |                  | 18%  | 0.80 |
|                        |                  | 18%  | 0.75 |
| Wheat                  | 7%               | 0.77 |      |
|                        | low level        | 7%   | 0.79 |
|                        |                  | 7%   | 0.79 |
|                        |                  | 9%   | 0.83 |
|                        | medium level     | 9%   | 0.79 |
|                        |                  | 9%   | /    |
|                        |                  | 18%  | 0.76 |
|                        |                  | 18%  | 0.82 |
|                        |                  | 18%  | 0.82 |
|                        |                  | 22%  | 0.81 |
|                        | high level       | 22%  | 0.77 |
|                        |                  | 22%  | 0.76 |
|                        |                  | 27%  | 0.77 |
|                        |                  | 27%  | 0.74 |
|                        |                  | 27%  | 0.69 |
| 33%                    |                  | 0.69 |      |
|                        | 33%              | 0.68 |      |
|                        | 33%              | 0.72 |      |

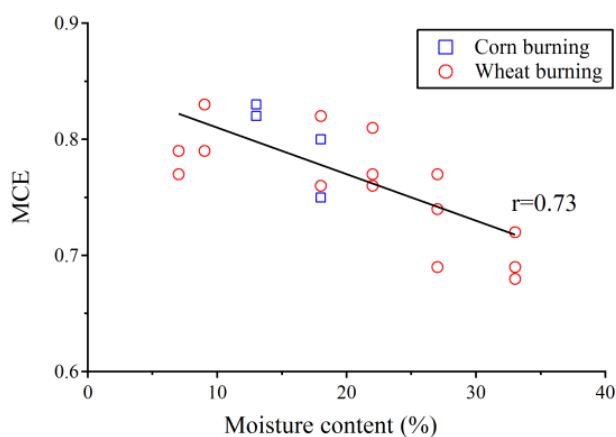

Figure S2 Variations of MCE as a function of moisture contents. The Pearson correlation=0.73 at the 0.01 significance level.

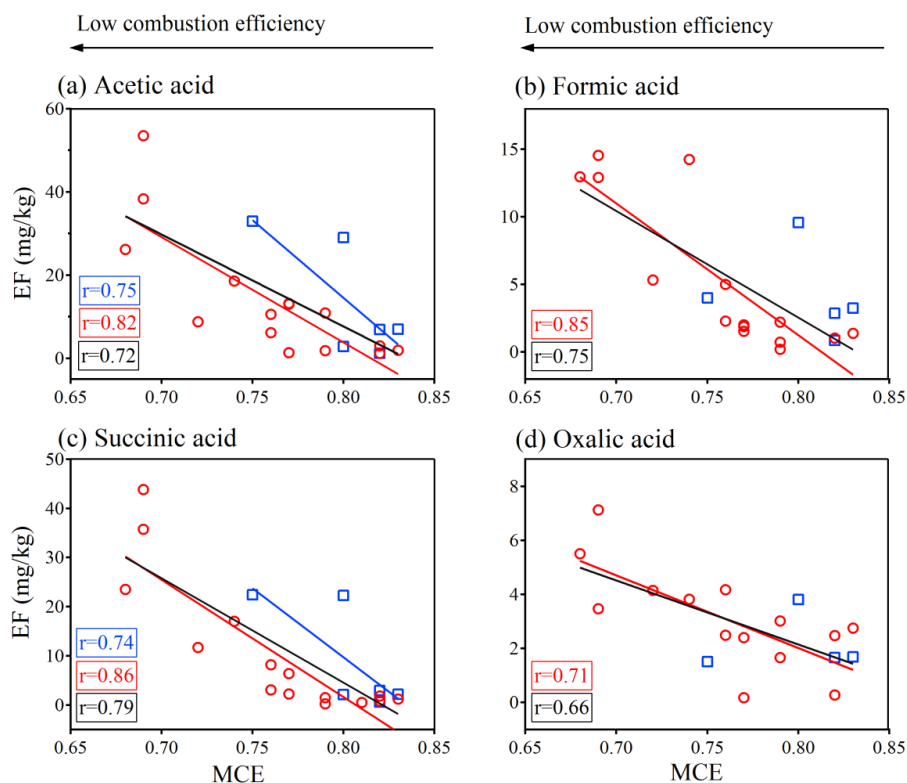

Figure S3 Emission factors of low molecular weight organic acids (acetic acid, formic acid, succinic acid, and oxalic acid) as a function of combustion efficiency. Corn and wheat burning emissions are denoted by red and blue color, respectively. The  $r$  values in each panel are the correlation coefficients between emission factors and MCE for corn (blue), wheat (red) and overall (black) burning experiments.

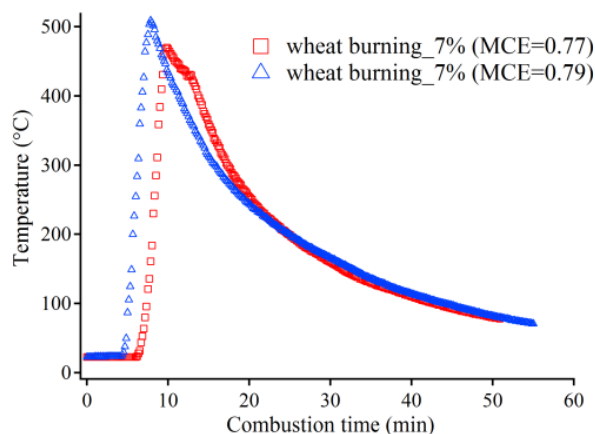

Figure S4 Variations of measured fire temperatures during two wheat straw (moisture content=7%) burning experiments with MCE=0.77 and 0.79.

## References

He, L. Y., Lin, Y., Huang, X. F., Guo, S., Xue, L., Su, Q., Hu, M., Luan, S. J., and Zhang, Y. H.: Characterization of high-resolution aerosol mass spectra of primary organic aerosol emissions from Chinese cooking and biomass burning, *Atmos. Chem. Phys.*, 10, 11535-11543, 10.5194/acp-10-11535-2010, 2010.
